# Supplementary material for: Dermal Delivery of Constructs Encoding Cre Recombinase to Induce Skin Tumors in PtenLoxP/LoxP;BrafCA/+ Mice
Source: PubMed Central journal article supplement (PMC5187949; doi:10.3390/ijms17122149), 2016-12-20
Supplement: ijms-17-02149-s001.pdf [file ijms-17-02149-s001.pdf]

## Supplementary Materials: Dermal Delivery of Constructs Encoding Cre Recombinase to Induce Skin Tumors in *Pten*<sup>LoxP/LoxP</sup>;*Braf*<sup>CA/+</sup> Mice

Marcel A. Deken, Ji-Ying Song, Jules Gadiot, Adriaan D. Bins, Paula Kroon, Inge Verbrugge and Christian U. Blank

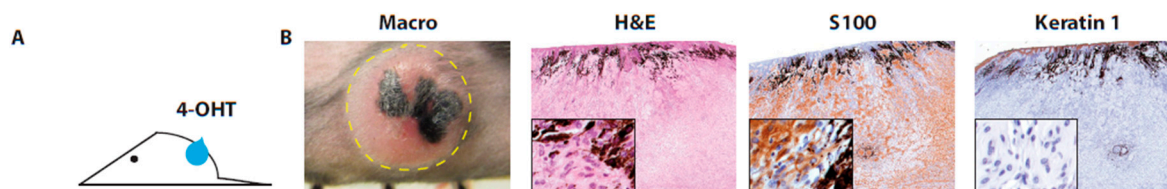

**Figure S1.** Dermal application of 4-hydroxytamoxifen (4-OHT) to the skin of *Tyr::CreER<sup>T2</sup>*; *Pten*<sup>LoxP/LoxP</sup>;*Braf*<sup>CA/+</sup> mice led to tumor formation; (A) Schematic representation of 4-hydroxytamoxifen application; (B) Macroscopic image and microphotographs of H&E and S100 and keratin 1 staining of a representative tumor. Scale bar: 2.5×: 500  $\mu$ m; the width of the zoomed insert is 130  $\mu$ m.

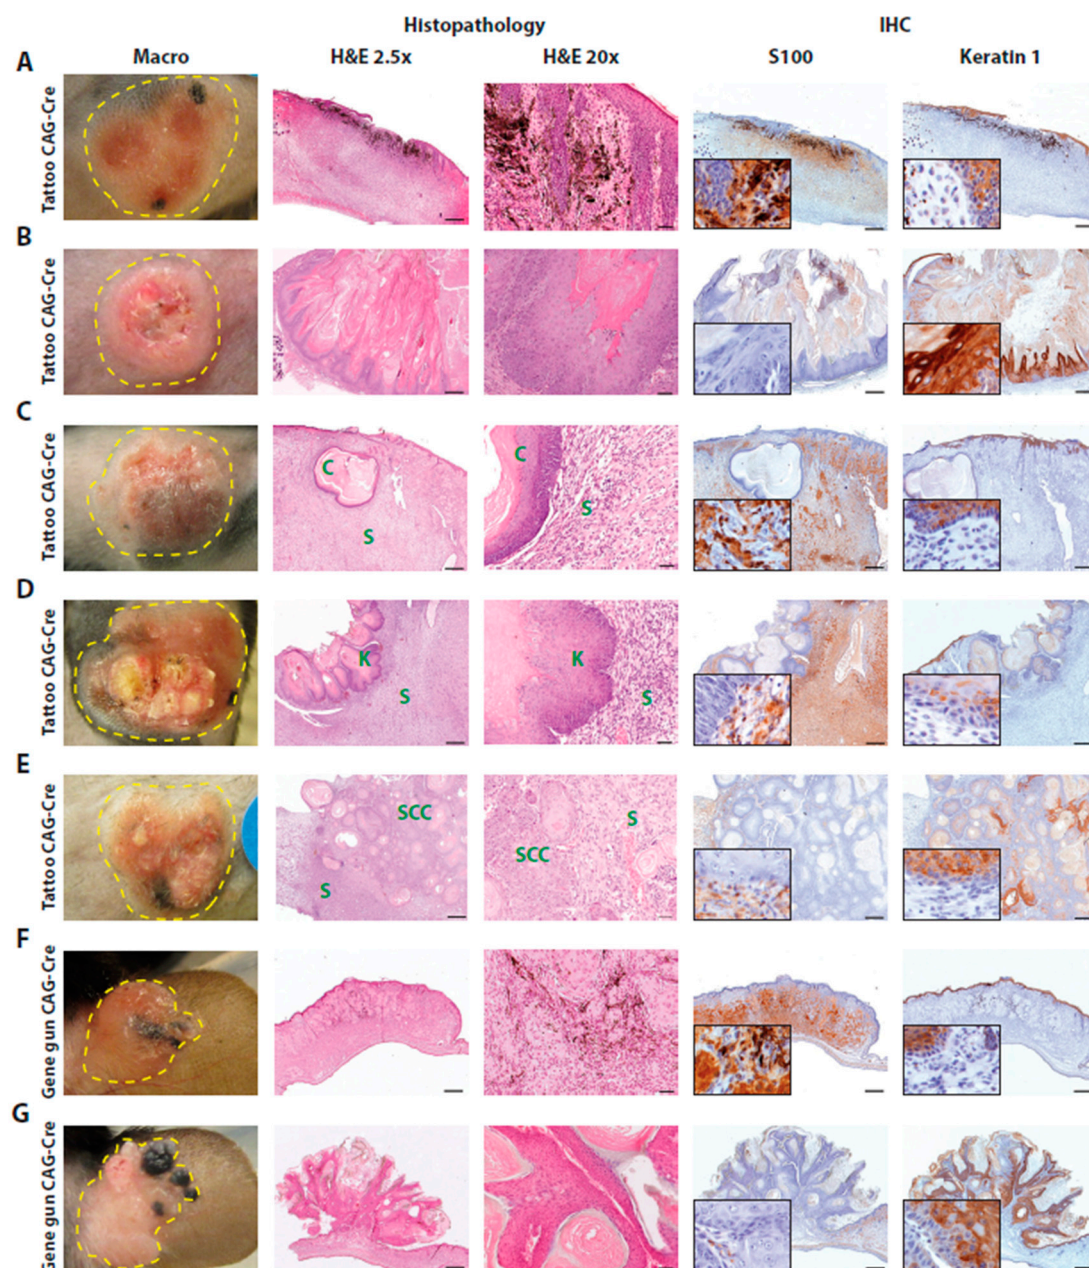

**Figure S2.** Dermal delivery of Cre recombinase expressing constructs under control of the non-specific CAG promoter or the specific mTyr promoter in *Pten<sup>LoxP/LoxP</sup>;Braf<sup>CA/+</sup>* mice led to tumor formation. Tumors were induced in 4–10-week-old *Pten<sup>LoxP/LoxP</sup>;Braf<sup>CA/+</sup>* mice by the direct delivery of constructs encoding the Cre recombinase DNA by tattoo administration or particle-mediated gene transfer; (A–E) Macroscopic image and microphotographs of H&E and S100 and keratin 1 immunohistochemical stainings of tumors induced by DNA tattoo administration of pVAX1/CAG-Cre on the flank showing: (A) pigmented nevi with Schwannoma like lesions underneath; (B) keratoacanthomas; (C) lesion with Schwannoma-like characteristics and epidermal inclusion cyst; (D) lesion with atypical keratoacanthoma and Schwannoma-like lesions underneath; and (E) squamous cell carcinoma mixed with Schwannoma-like characteristics; (F,G) Macroscopic image and microphotographs of H&E and S100 and keratin 1 stainings of tumors induced by particle-mediated gene transfer of pVAX1/CAG-Cre on the ear showing: (F) lesion with pigmented regions, Schwannoma-like characteristics; (G) a macroscopically-mixed lesion with pigmented nevi, squamous cell papilloma and keratoacanthomas, microphotographs of H&E and S100 and keratin 1 stainings of squamous cell papilloma. Abbreviations: C, cyst; IHC, immunohistochemistry; K, keratoacanthomas; S, Schwannoma characteristics; SCC, squamous cell carcinoma. Scale bars: 2.5x: 500  $\mu$ m; 20x: 50  $\mu$ m; the width of the zoomed insert is 130  $\mu$ m.

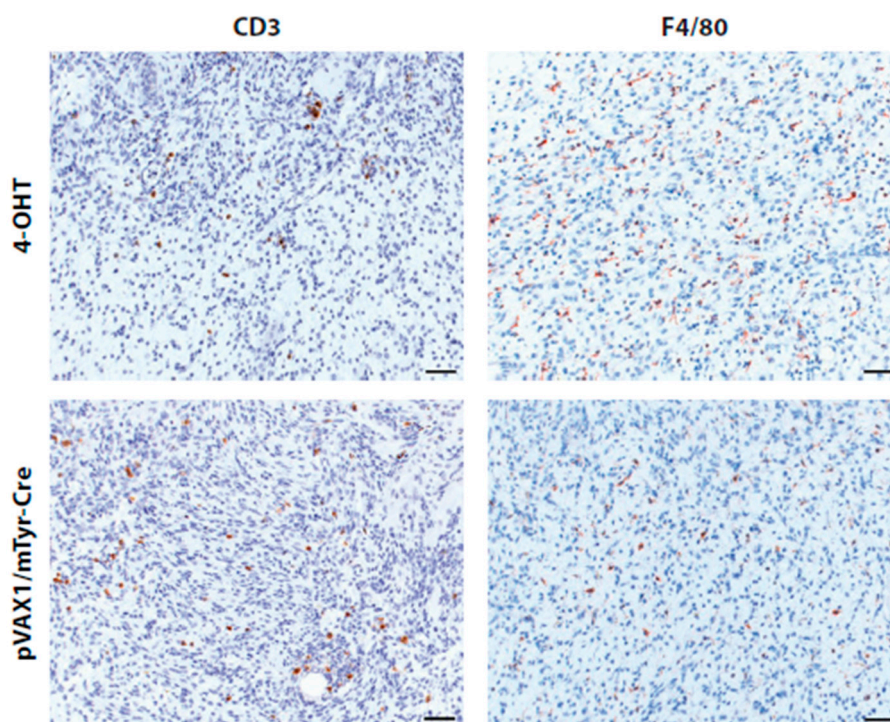

**Figure S3.** Representative microphotographs of CD3 (T lymphocytes) and F4/80 (macrophages) immunohistochemical stainings of tumors induced by 4-hydroxytamoxifen (4-OHT) in *Tyr::CreERT2;Pten<sup>LoxP/LoxP</sup>;Braf<sup>CA/+</sup>* mice and induced by DNA tattoo-mediated delivery of pVAX1/mTyr-Cre in *Pten<sup>LoxP/LoxP</sup>;Braf<sup>CA/+</sup>* mice. Scale bar: 2.5×: 500  $\mu$ m.

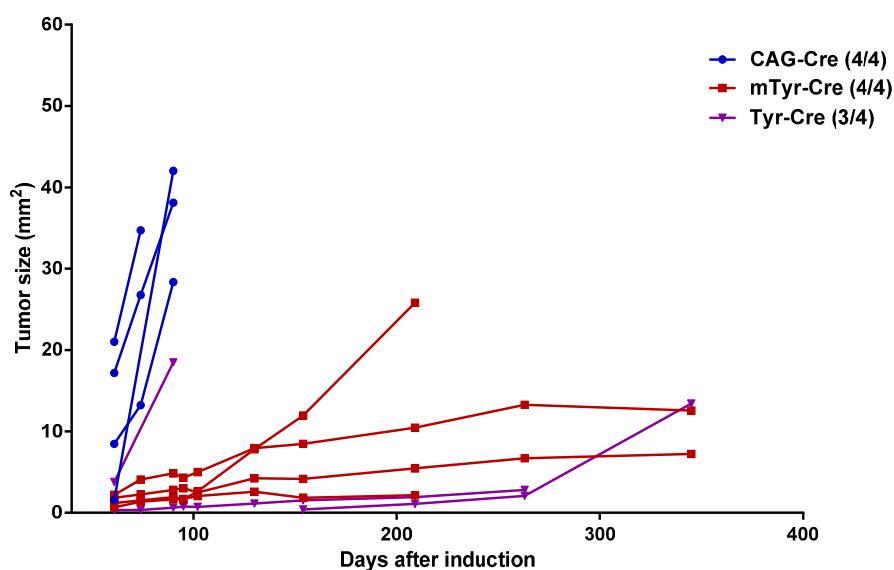

**Figure S4.** Outgrowth of tumors induced by particle-mediated gene transfer on the ear. Tumors were induced by particle-mediated gene transfer of constructs expressing the Cre recombinase gene on the right ear of 4–10-week-old *Pten<sup>LoxP/LoxP</sup>;Braf<sup>CA/+</sup>* mice. Tumors were induced by the transfer of non-specific construct pVAX1/CAG-Cre (blue lines); or melanocyte-specific constructs pVAX1/mTyr-Cre (red lines); and pVAX1/Tyr-Cre (purple lines). Tumor outgrowth was monitored over time by digital photography, and tumor size was plotted against time from tumor induction. Data are expressed per individual mouse.

**Table S1.** Primers used to introduce restriction sites or for sequence verification.

| <b>Name</b>              | <b>Sequence</b>                     |
|--------------------------|-------------------------------------|
| XbaI-Cre PCR forward     | 5'TATCTAGATGAGCCGCCACCATGGCC3'      |
| Cre-ApaI PCR reverse     | 5'TAGGGCCCCTATCACAGATCTTCTTCAGAAA3' |
| pVAX1-noCMVcheck forward | 5'GATGTACGGGCCAGATATACGCG3'         |
| pVAX1-noCMVcheck reverse | 5'AGTGGGAGTGGCACCTTCCAG3'           |
